# Supplementary material for: Formative peer assessment in healthcare education programmes: protocol for a scoping review
Source: PubMed Central journal article supplement — BMJ Open. 2018 Nov 8;8(11):e025055. doi: 10.1136/bmjopen-2018-025055 (PMC6231592; doi:10.1136/bmjopen-2018-025055), 2018-11-08
Supplement: bmjopen-2018-025055.draft_revisions.pdf [file bmjopen-2018-025055.draft_revisions.pdf]

# BMJ Open

BMJ Open is committed to open peer review. As part of this commitment we make the peer review history of every article we publish publicly available.

When an article is published we post the peer reviewers' comments and the authors' responses online. We also post the versions of the paper that were used during peer review. These are the versions that the peer review comments apply to.

The versions of the paper that follow are the versions that were submitted during the peer review process. They are not the versions of record or the final published versions. They should not be cited or distributed as the published version of this manuscript.

BMJ Open is an open access journal and the full, final, typeset and author-corrected version of record of the manuscript is available on our site with no access controls, subscription charges or pay-per-view fees (<http://bmjopen.bmj.com>).

If you have any questions on BMJ Open's open peer review process please email [info.bmjopen@bmj.com](mailto:info.bmjopen@bmj.com)

# BMJ Open

## Formative peer assessment in healthcare education programs – protocol for a scoping review

|                               |                                                                                                                                                                                                                    |
|-------------------------------|--------------------------------------------------------------------------------------------------------------------------------------------------------------------------------------------------------------------|
| Journal:                      | <i>BMJ Open</i>                                                                                                                                                                                                    |
| Manuscript ID                 | bmjopen-2018-025055                                                                                                                                                                                                |
| Article Type:                 | Protocol                                                                                                                                                                                                           |
| Date Submitted by the Author: | 27-Jun-2018                                                                                                                                                                                                        |
| Complete List of Authors:     | Stenberg, Marie; Malmo University, Care Science<br>Mangrio, Elisabeth; Malmo University, Care Science<br>Bengtsson, Mariette; Malmo University, Care Science<br>Carlson, Elisabeth; Malmo University, Care Science |
| Keywords:                     | Protocols & guidelines < HEALTH SERVICES ADMINISTRATION & MANAGEMENT, MEDICAL EDUCATION & TRAINING, QUALITATIVE RESEARCH                                                                                           |
|                               |                                                                                                                                                                                                                    |

SCHOLARONE™  
Manuscripts

Peer Review Only

1  
2  
3  
4  
5  
6  
7  
8  
9  
10  
11  
12  
13  
14  
15  
16  
17  
18  
19  
20  
21  
22  
23  
24  
25  
26  
27  
28  
29  
30  
31  
32  
33  
34  
35  
36  
37  
38  
39  
40  
41  
42  
43  
44  
45  
46  
47  
48  
49  
50  
51  
52  
53  
54  
55  
56  
57  
58  
59  
60

## Formative peer assessment in healthcare education programs – protocol for a scoping review

Marie Stenberg<sup>1</sup> RN; MNSc [marie.stenberg@mau.se](mailto:marie.stenberg@mau.se)

Elisabeth Mangrio<sup>1</sup> RN, PhD [elisabeth.mangrio@mau.se](mailto:elisabeth.mangrio@mau.se)

Mariette Bengtsson<sup>1</sup> RN, PhD, Associate Professor [mariette.bengtsson@mau.se](mailto:mariette.bengtsson@mau.se)

Elisabeth Carlson<sup>1</sup> RN, PhD, Associate Professor [elisabeth.carlson@mau.se](mailto:elisabeth.carlson@mau.se)

<sup>1</sup>Department of Care Science, Faculty of Health and Society, Malmö University, SE 205 06 Sweden

**Corresponding author:** Marie Stenberg, Faculty of Health and Society, Jan Waldenströmsg 25, Malmö University, SE 214 28 Malmö, Sweden

Tel: +46 40 665 79 44

E-Mail: [marie.stenberg@mau.se](mailto:marie.stenberg@mau.se)

**Word count:** 2056

## ABSTRACT

**Introduction:** In formative peer assessment the students give and receive feedback from each other and expand their knowledge in a social context of interaction and collaboration. The ability to collaborate and communicate are essential parts of the healthcare professionals' competence and deliver of safe patient care. Thereby, it is of utmost importance to support students with activities fostering those competences during their healthcare education. The aim of the scoping review is to compile research on peer assessment presented in healthcare education programs, focusing formative assessment. The scoping review will act as a guide prior to develop a peer assessment intervention in a healthcare program.

**Methods and analysis:** The scoping review will be conducted by using the framework presented by Arksey & O'Malley and Levac et al. The primary research question is: How are formative peer assessment interventions delivered in healthcare education? The literature search will be conducted in the peer-reviewed databases PubMed, CINAHL, ERC and ERIC. Additional search will be performed in Google Scholar, hand-search reference lists of included studies and Libsearch for identification of grey literature. Two researcher will independently screen title and abstract. Full text articles will be screened by three researchers using a protocol. A flow diagram will present the included and excluded studies. A narrative review will be conducted by using content analysis. The findings will be presented under thematic headings using a summary table. To enhance validity, stakeholders from healthcare education programs and healthcare institutions will be provided with an overview of the preliminary results.

**Ethics and dissemination:** Research ethics approval is not required for the scoping review. The result of the scoping review will form the basis for developing and conducting an intervention focusing collaborative learning and peer assessment in a healthcare education program.

## STRENGTH AND LIMITATIONS OF THE STUDY

- The result of the scoping review will establish a baseline for understanding the concept of formative peer assessment in healthcare education programs prior to developing an intervention focusing peer assessment in a healthcare education programme.
- A systematic search strategy will be conducted in four electronic databases with peer reviewed literature, including search in library databases for inclusion of books, e-books and grey literature.
- Search strategies will be developed in collaboration with a research librarian well versed in research databases.
- No formal quality assessment will be conducted as the scoping aims to provide a map of the landscape of formative peer assessment in healthcare education.
- Only articles and documents published in English will be included.

## INTRODUCTION

Peer assessment is described as an essential part of collaborative learning since students exercise their ability to give and receive feedback.[1] This supports students in gaining insights and understanding of assessment criteria and their personal approach to an assessment task mirrored in a peer.[1] Furthermore, peer assessment helps students develop judgement skills, critiquing abilities and self-awareness.[1] It can be defined as “*an arrangement in which individuals consider the amount, level, quality, or success of the products or outcomes of learning of peers of similar status*”(p. 118).[2] Peer assessment has been described in a variety of contexts and with various aims including measuring professional competence of medical students[3], as a strategy to enhance students’ engagement in their own learning[4-5], and development of employability skills for students in higher education.[6]

In a peer assessment activity, students take responsibility for assessing the work of their peers against set assessment criteria,[1] and can be conducted as summative or formative assessments. The purpose of summative assessment is the grading and evaluation of students’ learning.[7] On the other hand, formative assessment focus the development of the student learning process.[8] In formative peer assessment the intention is to help students help each other when planning their learning.[9] The students expand their knowledge in a social

1  
2  
3 context of interaction and collaboration according to social constructivism principles.[10-11]  
4 In this social context they identify their strengths and weaknesses and develop metacognitive,  
5 personal and professional skills.[9] It is conversational in nature[12] and fundamental is the  
6 use of feedback. Feedback is an integral aspect of peer assessment[7] with the intention to  
7 enhance student learning.[13]  
8  
9  
10

11  
12 A recent published review of assessment in higher education[14] raised the issue that studies  
13 on peer assessment are deficient in referring to exactly what peer assessment aims to achieve  
14 and in addition empirical investigations are missing (ibid). Boud et al.[1] highlighted the  
15 importance of a shift in assessment, from individualistic assessment approaches to peer  
16 assessment if collaboration such as manifested in collaborative learning models is to be  
17 fostered (ibid). Since the ability to collaborate, communicate, assess, give and receive  
18 feedback are essential parts of healthcare professionals' competence and delivery of safe  
19 patient care. Thereby, it is of utmost importance to support students with activities fostering  
20 those competences during their healthcare education. These competences are related to  
21 professional teamwork, as well as broader goals for lifelong learning, and as argued by Boud  
22 et al.[1] address course-specific goals not readily developed otherwise. Therefore, the  
23 scoping review of peer assessment in higher education will act as an important guide prior to  
24 develop an empirical investigation focusing peer assessment interventions in a healthcare  
25 education program.  
26  
27  
28  
29  
30  
31  
32  
33  
34  
35

## 36 37 **METHOD**

38  
39 A scoping review aims to map the concepts, main sources and evidence available in a  
40 particular research area to get a broader understanding of a specific subject[15] and has  
41 increased in popularity in recent years in health- and social sciences.[16] Scoping reviews  
42 are often conducted as a preliminary investigative process that help the researchers to  
43 formulate a research question and develop research proposals[17] and as essential basis  
44 for curriculum development and program implementation.[18]  
45  
46  
47  
48

49 This scoping review will be conducted by using the York methodology by Arksey and  
50 O'Malley[15] and taking into consideration recommendations presented by Levac et al.  
51 [19]. A scoping review follows a six-stage process including: 1) Identifying a research  
52 question 2) Identifying relevant studies, 3) Study selection, 4) Charting the data, 5)  
53 Collating, summarizing and reporting the result, and 6) Consultation.[15,19] This six-  
54  
55  
56  
57

1  
2  
3 stage process associates with the process in conducting a systematic review. They both  
4 use rigorous and transparent methods to identify and analyse all the relevant literature  
5 pertaining to a research question[20] This scoping review does not aim to assess the  
6 quality and validity of the studies in order to synthesize best practice guidelines as in a  
7 systematic review. Rather, it aims to get a broad picture and to highlight recent efforts and  
8 key concepts of peer assessment as an integral component for students in higher  
9 education. Therefore, this scoping review need to include a greater range of  
10 methodologies and study designs than what would be possible in a systematic review, that  
11 often focus on randomized controlled trials.[15]

12  
13  
14 Furthermore, a scoping review can be of use when a topic is of a complex or  
15 heterogeneous nature[21] and as an essential basis for curriculum development and  
16 program implementation.[18] Since the literature on peer assessment is extensive and  
17 with some ambiguity in precise definitions[14] and conducted in varying contexts in  
18 higher education this method seemed appropriate to answer the research questions. In  
19 other words, peer assessment is multifaceted and a scoping review may provide the  
20 researchers with a broad and in depth knowledge of this particular subject. The reported  
21 result will be essential for conducting further development of an intervention aiming to  
22 implement and evaluate peer assessment as part of a collaborative learning approach in a  
23 healthcare education program.

### 24 25 26 **Stage 1: Identifying the research question**

27  
28 The aim of this scoping review is to compile research about peer assessment presented in  
29 higher education, focusing formative assessment. The primary research question is:

- 30 • How are formative peer assessment interventions delivered in healthcare  
31 education?

32  
33 Further questions to be answered are:

- 34 • What are the rationales for using formative peer assessment in healthcare  
35 education?
- 36 • What experiences of formative peer assessment are presented from the perspective  
37 of students and teachers in healthcare education and in what context (e.g. clinical  
38 practice, pre-clinical- and theoretical courses)?
- 39 • What outcomes are presented from formative peer assessment interventions?

Levac et al.[19] recommend a clear articulation of the research question. In a systematic review the question to guide the search is often based on the “Population Intervention Context Outcome” elements (PICO). Since a scoping review has less restrictive inclusion criteria than a systematic review the “Population Concept and Context” elements (PCC, table 1) can be used to establish an effective search criteria.[22]

Table 1. The PCC mnemonic as recommended by the Joanna Briggs Institute.[22]

| Population                  | Concept                                                                               | Context                                           |
|-----------------------------|---------------------------------------------------------------------------------------|---------------------------------------------------|
| Students assessing students | Intervention, rationale, outcome, context and experience of formative peer assessment | Healthcare education programs in higher education |

## Stage 2: Identifying relevant studies

The literature search will be conducted in the peer-reviewed databases, PubMed, Cumulative Index to Nursing and Allied Health Literature (CINAHL), Education Research Complete (ERC) and Education Research Centre (ERIC). Search tools such as Medical Subject Headings (MeSH), Headings, Thesaurus and Boolean operators (AND/OR) will be used to expand and narrow the search. Additional search will be performed in Google Scholar, hand-search reference lists of included studies and Libsearch for identification of grey literature. No limitations will be set to the year of publication. Finally, search strategies will be developed in collaboration with a research librarian well versed in research databases.

Initially the search terms will be purposefully broad (e.g. peer assessment, higher education) in order to capture the range of published literature. However, the extensiveness of material will determine if more narrow inclusion criteria are necessary for managing the material. The following inclusion criteria will be applied in the search: a) the articles have to address peer assessment in higher education b) focusing formative peer assessment c) students in healthcare education programs d) peer reviewed articles, grey literature, books etc.

Since the distinction between different assessment terms and how different authors define peer assessment varies[14] related concepts to peer assessment (peer feedback, peer evaluation, peer observation, peer reflection etc.) will be incorporated in the search to ensure that no study is missed due to ambiguity in definition of the subject.



Articles including summative peer assessment will be excluded unless the study involves formative assessment. However, a distinction between the two must be transparent if the study is to be included. If there is any uncertainty the study will be excluded.

Furthermore, full articles, abstracts, conference posters, or power point presentations unavailable for review will be excluded.

### **Stage 3: Study selection**

Initially the title and abstract will be screened by two members of the research team. The team may at this stage need to discuss the inclusion and exclusion criteria and refine the search.[19] If the title is in line with the review purpose the abstract will be read. This procedure will be conducted by two researchers separately and guided by the inclusion criteria and research question. If any disagreement appears, a third research member will be consulted. This initial step will determine whether the criteria captures relevant studies. Secondly, the full-text articles will be imported into the web-based bibliographic manager RefWorks 2.0 to enable easily removal of duplicates and for organizational feasibility. Each paper will be given a unique number for easily identification and to keep track of included and excluded articles.[23]

### **Stage 4: Charting the data**

The full-text articles will be screened by three researchers independently. For managing the documentation of extracted data from the included studies a charting form will be used. The protocol will include the inclusion criteria and an explanation of why the study is included or excluded at this stage in the process. If there are any reservations or discordant opinions a fourth researcher will be consulted until consensus is reached. To enable replications by others, increase reliability of the findings and for methodological accuracy[15] the process will be documented in a flow diagram using the Preferred Reporting Items for Systematic Reviews and Meta-Analyses (PRISMA) as presented by Moher et al.[24] and recommended by Pham et al.[16]

### **Stage 5: Collating, summarising and reporting results**

Collating and managing the results from the included articles will be conducted by using a data analysis software program, NVivo 11. NVivo is a code-based system developed to support structured qualitative data.[25] Even though, the analysis part of the data material

1  
2  
3 needs to be abstracted by the researcher, the software may support an overview of codes,  
4 themes and their relationships and connections.[25]  
5

6  
7 The data will undergo a narrative review using an inductive methodology. Analysing the  
8 data will be conducted by using the general principles for content analysis as presented by  
9 Bengtsson.[26] Content analysis allows a large amount of data, includes all types of  
10 written text. To maintain quality and trustworthiness each stage of the data analysis will  
11 be presented in a scheme.[26] The findings will be presented under thematic headings  
12 using a summary table which can inform a description of key points. Detailed tables will  
13 present: a) author (s) b) the geographical distribution of studies c) year of publication d)  
14 educational interventions presented e) the professional healthcare program that the studies  
15 refers to f) reported experiences, outcome and main findings of peer assessment initiatives  
16 and g) research methodology.  
17  
18  
19  
20  
21  
22

### 23 **Stage 6: Consultation**

24  
25 Consultation is an optional stage,[15] however, since it adds methodological rigor[19] it  
26 will be incorporated in the scoping review. The consultation will be conducted when  
27 preliminary results are organised in charts and tables (stage 5). Stakeholders from  
28 healthcare education programs (students and teachers) and healthcare institutions  
29 (preceptors) will be provided with an overview of the preliminary results. The purpose of  
30 the consultation is to enhance the validity of the study outcome and to facilitate  
31 appropriate dissemination of outputs.  
32  
33  
34  
35  
36

### 37 **ETHICS AND DISSEMINATION**

38  
39 Research ethics approval is not required for the scoping review. Information will only be  
40 extracted from public databases. The result of this scoping protocol will form the basis for  
41 conducting a scoping review of formative peer assessment in a healthcare education program.  
42 The results will be presented at national and international conferences and published in peer-  
43 reviewed journal and will be of interest for healthcare and academics institutions.  
44  
45  
46  
47

48  
49 **Authors' Contribution:** MS led the design, search strategy and conceptualization of this  
50 work and drafted the protocol. EM, MB and EC were involved in the conceptualization of the  
51 review design, inclusion and exclusion criteria and provided feedback on the methodology  
52 and the manuscript. All authors give their approval to the publishing of this protocol  
53 manuscript.  
54  
55  
56  
57

**Funding statement:** This research received no specific grant from any funding agency in the public, commercial or not-for-profit sectors.

**Competing interests:** None declared

## REFERENCES

- 1 Boud D, Cohen R, Sampson J. Peer learning and assessment. *Assessment and Evaluation in Higher Education* 1999; 24(4)413-26.
- 2 Topping KJ, Ehly SW. Peer assisted learning: a framework for consultation. *Journal of Educational and Psychological Consultation* 1998;12:113-32.
- 3 Dannefer EF, Henson LC, Bierer B et al. Peer assessment of professional competence. *Medical Education* 2005;39:713-22.
- 4 Casey CH, Mee L, Smith R et al. Use of peer assessment as a student engagement strategy in nurse education. *Nursing and Health Sciences* 2011;13:514-20.
- 5 Orsmond P, Merry S, Callaghan A. Implementation of a formative assessment model incorporating peer and self-assessment. *Innovations in Education and Teaching International* 2004;41(3)273-90.
- 6 Cassidy S. Developing employability skills: peer assessment in higher education. *Education + Training* 2006;48(7) 508-17.
- 7 Black P, Wiliam D. Assessment and Classroom Learning. *Assessment in Education: Principles, Policy & Practice* 1998;5(1)7-74.
- 8 Sadler D. Beyond feedback: developing student capability in complex appraisal. *Assessment & Evaluation in Higher Education* 2010;35(5)535-50.
- 9 Topping KJ. Peer Assessment. *Theory into Practice* 2009;48:20–27.
- 10 Reece I, Walker S. A Practical Guide to Teaching, Training and Learning. 6th ed. Sunderland: Business Education Publishers 2007.
- 11 Olusegun S. Constructivism Learning Theory: A Paradigm for Teaching and Learning. *Journal of Research & Method in Education* 2015;56: 66-70.
- 12 Hastie C, Fahy K, Parratt J. The development of a rubric for peer assessment of individual teamwork skills in undergraduate midwifery students. *Women and Birth* 2014;27:220-26.
- 13 Nicol DJ, MacFarlane-Dick D. Formative assessment and self-regulated learning: A model and seven principles of good feedback practice. *Studies in Higher Education* 2006;31(2)199-218.
- 14 HEA. Assessment and feedback in higher education. A review of literature of Higher

- 1  
2  
3 Education Academy. Jackel B, Pearce J, Radloff A, Daniels E. Transforming teaching  
4 and inspiring learning 2017.  
5
- 6 15 Arksey H, O'Malley L. Scoping studies: Towards a methodological framework. *International*  
7 *Journal of Social Research Methodology* 2005;8(1)19-32.  
8
- 9 16 Pham MT, Rajic A, Greg JD et al. A scoping review of scoping reviews:  
10 advancing the approach and enhancing the consistency. *Research Synthesis*  
11 *Methods* 2014;5:371-85.  
12
- 13 17 Davis K, Drey N, Gould D. What are scoping studies? A review of the nursing  
14 literature. *International Journal of Nursing Studies* 2009;46:1386-400.  
15
- 16 18 Guerra O, Kurtz D. Building collaboration: A scoping review of cultural competency  
17 and safety education and training for healthcare students and professionals in Canada.  
18 *Teaching and learning in Medicine* 2017;29(2)129-42.  
19
- 20 19 Levac D, Colquhoun H, O'Brian KK. Scoping studies: advancing the methodology.  
21 *Implementation science* 2010;5:69.  
22
- 23 20 DiCenso A, Martin-Misener R, Bryant-Lukosius D et al. Advanced practice nursing in  
24 Canada: overview of a decision support synthesis. *Nursing Leadership* 2010;23:15-34.  
25
- 26 21 Mays N, Roberts E, Popay J. Synthesizing research evidence. In: Fulop N, Allen P,  
27 Clark A, Black N, eds. *Studying the organization and delivery of services: Research*  
28 *methods*. London: Routledge 2001;188-219.  
29
- 30 22 Joanna Briggs Institute. The Joanna Briggs Institute Reviewers' Manual 2015.  
31 Methodology for JBI Scoping reviews. The University of Adelaide. South Australia  
32 2015.  
33
- 34 23 Daudt HM, van Mossel C, Scott SJ. Enhancing the study methodology: a large,  
35 interprofessional team's experience with Arksey and O'Malley's framework. *BMC*  
36 *Medical Research Methodology* 2013;13(48).  
37
- 38 24 Moher D, Liberati A, Tetzlaff J et al. The PRISMA Group. Preferred Reporting  
39 *Items for Systematic Reviews and Meta-Analyses: The PRISMA Statement*.  
40 PLoS Med 2009;6(7)e1000097.  
41
- 42 25 Silver C, Lewins, A. Using software in Qualitative research a step-by-step guide. London:  
43 Sage Publication 2007.  
44
- 45 26 Bengtsson M. How to plan and perform a qualitative study using content analysis.  
46 *NursingPlus Open* 2016;2:8-14.  
47  
48  
49  
50  
51  
52  
53  
54  
55  
56  
57  
58  
59  
60

## PRISMA 2009 Flow Diagram

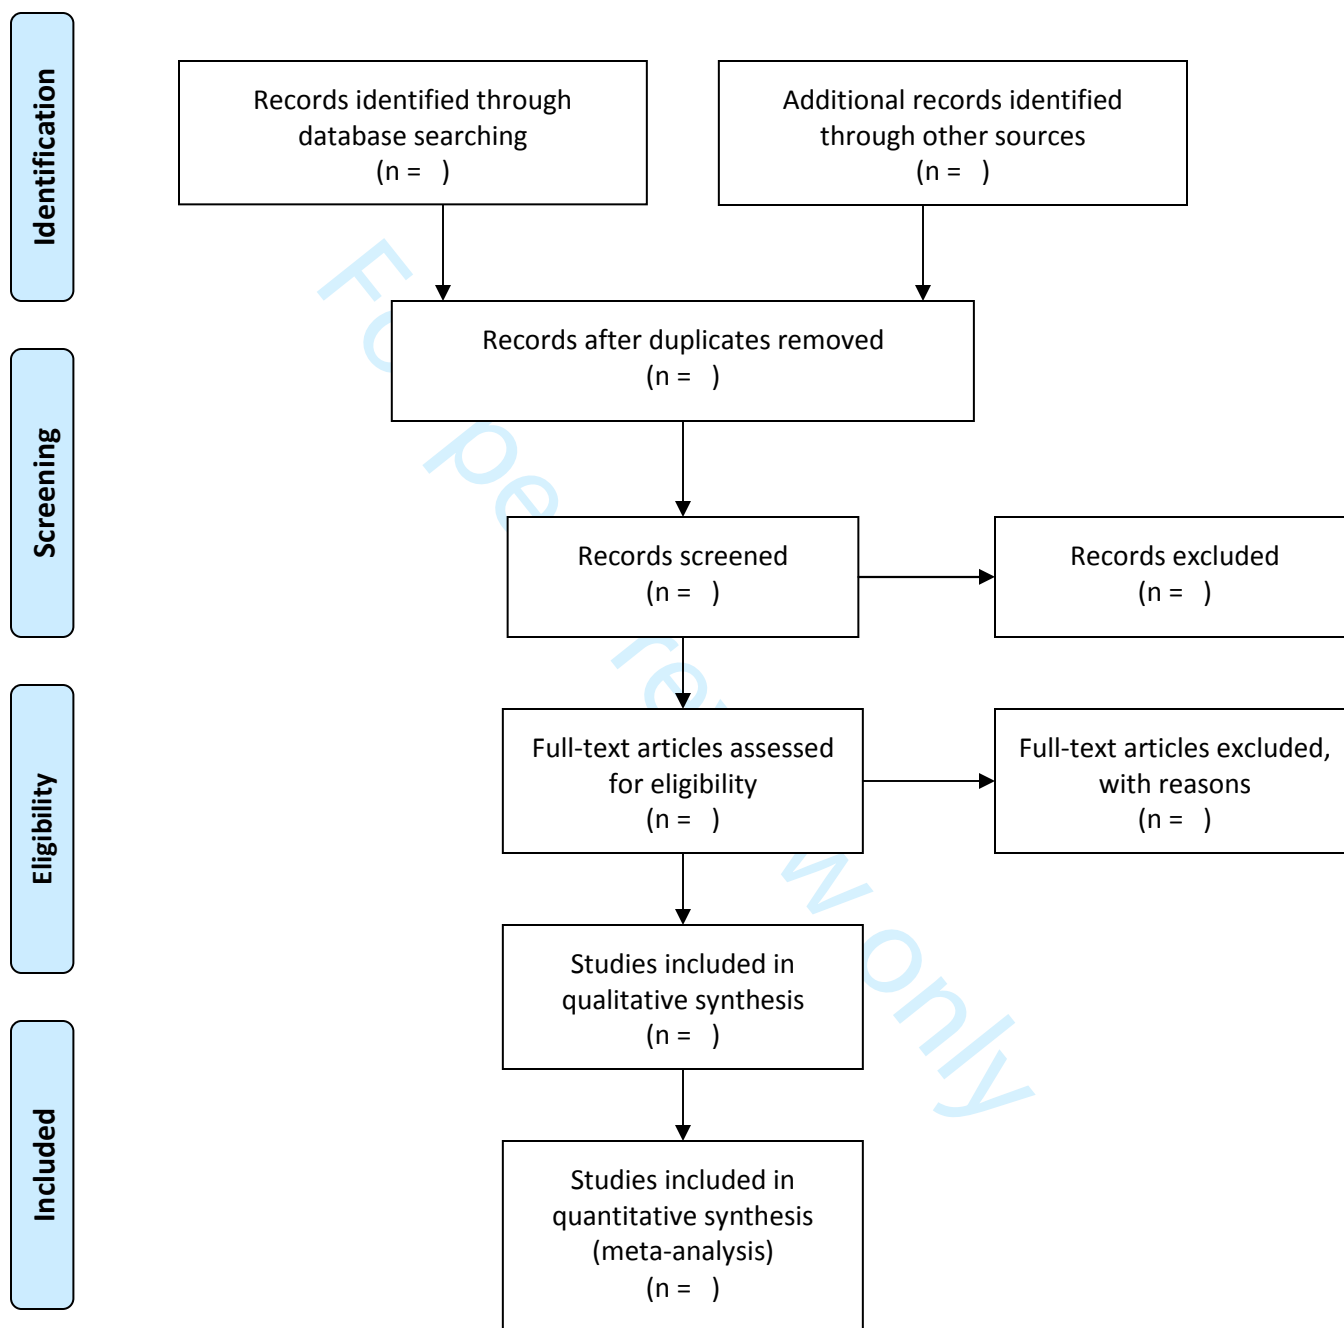

From: Moher D, Liberati A, Tetzlaff J, Altman DG, The PRISMA Group (2009). Preferred Reporting Items for Systematic Reviews and Meta-Analyses: The PRISMA Statement. PLoS Med 6(7): e1000097. doi:10.1371/journal.pmed1000097

# BMJ Open

## Formative peer assessment in healthcare education programs – protocol for a scoping review

|                                 |                                                                                                                                                                                                                    |
|---------------------------------|--------------------------------------------------------------------------------------------------------------------------------------------------------------------------------------------------------------------|
| Journal:                        | <i>BMJ Open</i>                                                                                                                                                                                                    |
| Manuscript ID                   | bmjopen-2018-025055.R1                                                                                                                                                                                             |
| Article Type:                   | Protocol                                                                                                                                                                                                           |
| Date Submitted by the Author:   | 17-Aug-2018                                                                                                                                                                                                        |
| Complete List of Authors:       | Stenberg, Marie; Malmo University, Care Science<br>Mangrio, Elisabeth; Malmo University, Care Science<br>Bengtsson, Mariette; Malmo University, Care Science<br>Carlson, Elisabeth; Malmo University, Care Science |
| <b>Primary Subject Heading</b>: | Medical education and training                                                                                                                                                                                     |
| Secondary Subject Heading:      | Medical education and training, Research methods                                                                                                                                                                   |
| Keywords:                       | Protocols & guidelines < HEALTH SERVICES ADMINISTRATION & MANAGEMENT, MEDICAL EDUCATION & TRAINING, QUALITATIVE RESEARCH                                                                                           |
|                                 |                                                                                                                                                                                                                    |

SCHOLARONE™  
Manuscripts

1  
2  
3  
4  
5  
6  
7  
8  
9  
10  
11  
12  
13  
14  
15  
16  
17  
18  
19  
20  
21  
22  
23  
24  
25  
26  
27  
28  
29  
30  
31  
32  
33  
34  
35  
36  
37  
38  
39  
40  
41  
42  
43  
44  
45  
46  
47  
48  
49  
50  
51  
52  
53  
54  
55  
56  
57  
58  
59  
60

## Formative peer assessment in healthcare education programs – protocol for a scoping review

Marie Stenberg<sup>1</sup> RN; MNSc [marie.stenberg@mau.se](mailto:marie.stenberg@mau.se)

Elisabeth Mangrio<sup>1</sup> RN, PhD [elisabeth.mangrio@mau.se](mailto:elisabeth.mangrio@mau.se)

Mariette Bengtsson<sup>1</sup> RN, PhD, Associate Professor [mariette.bengtsson@mau.se](mailto:mariette.bengtsson@mau.se)

Elisabeth Carlson<sup>1</sup> RN, PhD, Associate Professor [elisabeth.carlson@mau.se](mailto:elisabeth.carlson@mau.se)

<sup>1</sup>Department of Care Science, Faculty of Health and Society, Malmö University, SE 205 06 Sweden

**Corresponding author:** Marie Stenberg, Faculty of Health and Society, Jan Waldenströmsg 25, Malmö University, SE 214 28 Malmö, Sweden

Tel: +46 40 665 79 44

E-Mail: [marie.stenberg@mau.se](mailto:marie.stenberg@mau.se)

**Word count:** 2056

## ABSTRACT

**Introduction:** In formative peer assessment the students give and receive feedback from each other and expand their knowledge in a social context of interaction and collaboration. The ability to collaborate and communicate are essential parts of the healthcare professionals' competence and delivery of safe patient care. Thereby, it is of utmost importance to support students with activities fostering these competences during their healthcare education. The aim of the scoping review is to compile research on peer assessment presented in healthcare education programs, focusing formative assessment. The result of the scoping review will form the basis for developing and conducting an intervention focusing collaborative learning and peer assessment in a healthcare education program.

**Methods and analysis:** The scoping review will be conducted by using the framework presented by Arksey & O'Malley and Levac et al. The primary research question is: How are formative peer assessment interventions delivered in healthcare education? The literature search will be conducted in the peer-reviewed databases PubMed, CINAHL, ERC and ERIC between September and December 2018. Additional search will be performed in Google Scholar, hand-searching of reference lists of included studies and Libsearch for identification of grey literature. Two researchers will independently screen title and abstract. Full text articles will be screened by three researchers using a charting form. Studies meeting the inclusion criteria will be critical evaluated using the Critical Appraisal Skills Programme. A flow diagram will present the included and excluded studies. A narrative synthesis will be conducted by using thematic analysis as presented by Braun and Clarke. The findings will be presented under thematic headings using a summary table. To enhance validity, stakeholders from healthcare education programs and healthcare institutions will be provided with an overview of the preliminary results.

**Ethics and dissemination:** Research ethics approval is not required for the scoping review.



## STRENGTH AND LIMITATIONS OF THE STUDY

- The result of the scoping review will establish a baseline for understanding the concept of formative peer assessment in healthcare education programs prior to developing an intervention focusing peer assessment in a healthcare education programme.
- A systematic search strategy will be conducted in four electronic databases with peer reviewed literature, including search in library databases for inclusion of books, e-books and grey literature.
- Search strategies will be developed in collaboration with a research librarian well versed using research databases.
- No formal quality assessment will be conducted as the scoping review aims to provide a map of the landscape of formative peer assessment in healthcare education.
- Only articles and documents published in English will be included.

## INTRODUCTION

Peer assessment is described as an essential part of collaborative learning since students exercise their ability to give and receive feedback.[1] This supports students in gaining insights and understanding of assessment criteria and their personal approach to an assessment task mirrored in a peer.[1] Furthermore, peer assessment helps students to develop judgement skills, critiquing abilities and self-awareness.[1] It can be defined as “*an arrangement in which individuals consider the amount, level, quality, or success of the products or outcomes of learning of peers of similar status*”(p. 118).[2] Peer assessment has been described in a variety of contexts and with various aims including measuring professional competence of medical students[3], as a strategy to enhance students’ engagement in their own learning[4-5], and development of employability skills for students in higher education.[6]

In a peer assessment activity, students take responsibility for assessing the work of their peers against set assessment criteria,[1] and can be conducted as summative or formative assessments. The purpose of summative assessment is the grading and evaluation of students’ learning.[7] On the other hand, formative assessment focus the development of students’ learning processes.[8] In formative peer assessment the intention is to help students help each other when planning their learning.[9] The students expand their knowledge in a social

1  
2  
3 context of interaction and collaboration according to social constructivism principles.[10-11]  
4 In this social context they identify their strengths and weaknesses and develop metacognitive,  
5 personal and professional skills.[9] It is conversational in nature[12] and fundamental is the  
6 use of feedback. Feedback is an integral aspect of peer assessment[7] with the intention to  
7 enhance student learning.[13]  
8  
9  
10

11  
12 A recent published review of assessment in higher education[14] raised the issue that studies  
13 on peer assessment are deficient in referring to exactly what peer assessment aims to achieve  
14 and in addition empirical investigations are missing. Boud et al.[1] highlighted the  
15 importance of a shift in assessment, from individualistic assessment approaches to peer  
16 assessment if collaboration such as manifested in collaborative learning models is to be  
17 fostered. Since the ability to collaborate, communicate, assess, give and receive feedback are  
18 essential parts of healthcare professionals' competence and delivery of safe patient care.  
19 Thereby, it is of utmost importance to support students with activities fostering those  
20 competences during their healthcare education. These competences are related to  
21 professional teamwork, as well as broader goals for lifelong learning, and as argued by Boud  
22 et al.[1] address course-specific goals not readily developed otherwise. Therefore, the  
23 scoping review of peer assessment in higher education will act as an important guide prior to  
24 develop an empirical investigation focusing peer assessment interventions in a healthcare  
25 education program.  
26  
27  
28  
29  
30  
31  
32  
33  
34  
35  
36

## 37 **METHOD**

38  
39 A scoping review aims to map the concepts, main sources and evidence available in a  
40 particular research area to get a broader understanding of a specific subject[15] and has  
41 increased in popularity in recent years in health- and social sciences.[16] Scoping reviews  
42 are often conducted as a preliminary investigative process that help the researchers to  
43 formulate a research question and develop research proposals[17] and as essential basis  
44 for curriculum development and program implementation.[18]  
45  
46  
47  
48

49 This scoping review will be conducted by using the York methodology by Arksey and  
50 O'Malley[15] and taking into consideration recommendations presented by Levac et al.  
51 [19]. A scoping review follows a six-stage process including: 1) Identifying a research  
52 question 2) Identifying relevant studies, 3) Study selection, 4) Charting the data, 5)  
53 Collating, summarizing and reporting the result, and 6) Consultation.[15,19] This six-  
54  
55  
56  
57

1  
2  
3 stage process associates with the process in conducting a systematic review. They both  
4 use rigorous and transparent methods to identify and analyse all the relevant literature  
5 pertaining to a research question.[20] This scoping review does not aim to assess the  
6 quality and validity of the studies in order to synthesize best practice guidelines as in a  
7 systematic review. Rather, it aims to get a broad picture and to highlight recent efforts and  
8 key concepts of peer assessment as an integral component for students in higher  
9 education. Therefore, this scoping review need to include a greater range of  
10 methodologies and study designs than what would be possible in a systematic review, that  
11 often focus on randomized controlled trials.[15]

12  
13  
14 Furthermore, a scoping review can be of use when a topic is of a complex or  
15 heterogeneous nature[21] and as an essential basis for curriculum development and  
16 program implementation.[18] Since the literature on peer assessment is extensive and  
17 with some ambiguity in precise definitions[14] and conducted in varying contexts in  
18 higher education this method seemed appropriate to answer the research questions. In  
19 other words, peer assessment is multifaceted and a scoping review may provide the  
20 researchers with a broad and in depth knowledge of this particular subject. The reported  
21 result will be essential for conducting further development of an intervention aiming to  
22 implement and evaluate peer assessment as part of a collaborative learning approach in a  
23 healthcare education program.

### 24 25 26 **Stage 1: Identifying the research question**

27  
28 The aim of this scoping review is to compile research about peer assessment presented in  
29 higher education, focusing formative assessment. The primary research question is:

- 30 • How are formative peer assessment interventions delivered in healthcare  
31 education?

32  
33 Further questions to be answered are:

- 34 • What are the rationales for using formative peer assessment in healthcare  
35 education?
- 36 • What experiences of formative peer assessment are presented from the perspective  
37 of students and teachers in healthcare education and in what context (e.g. clinical  
38 practice, pre-clinical- and theoretical courses)?
- 39 • What outcomes are presented from formative peer assessment interventions?

Levac et al.[19] recommend a clear articulation of the research question. In a systematic review the question to guide the search is often based on the “Population Intervention Context Outcome” elements (PICO). Since a scoping review has less restrictive inclusion criteria than a systematic review the “Population Concept and Context” elements (PCC, table 1) can be used to establish effective search criteria.[22]

Table 1. The PCC mnemonic as recommended by the Joanna Briggs Institute.[22]

| Population                  | Concept                                                                               | Context                                           |
|-----------------------------|---------------------------------------------------------------------------------------|---------------------------------------------------|
| Students assessing students | Intervention, rationale, outcome, context and experience of formative peer assessment | Healthcare education programs in higher education |

## Stage 2: Identifying relevant studies

The literature search will be conducted in the peer-reviewed databases, PubMed, Cumulative Index to Nursing and Allied Health Literature (CINAHL), Education Research Complete (ERC) and Education Research Centre (ERIC). Search tools such as Medical Subject Headings (MeSH), Headings, Thesaurus and Boolean operators (AND/OR) will be used to expand and narrow the search. Additional search will be performed in Google Scholar, hand-search reference lists of included studies and Libsearch for identification of grey literature. The search will be conducted between September and December, 2018. No limitations will be set to the year of publication. Finally, search strategies will be developed in collaboration with a research librarian well versed in research databases.

### *Inclusion and exclusion criteria*

The following inclusion criteria will be applied in the search: a) the articles have to address peer assessment in higher education b) focusing formative peer assessment c) students in healthcare education programs d) peer reviewed articles, grey literature, books etc. e) studies evaluated with moderate or high methodological quality according to the Critical Appraisal Skills Programme (CASP).[23] Initially the search terms will be purposefully broad (e.g. peer assessment, higher education) in order to capture the range of published literature. However, the extensiveness of material will determine if more narrow inclusion criteria are necessary for managing the material.

1  
2  
3 Since the distinction between different assessment terms and how different authors define  
4 peer assessment varies,[14] similar concepts related to peer assessment for example, peer  
5 feedback and peer evaluation, will be incorporated in the search to ensure that no study is  
6 missed due to ambiguity in definition of the subject.  
7  
8

9  
10 Articles including summative peer assessment will be excluded unless the study involves  
11 formative assessment. However, a distinction between the two must be transparent if the  
12 study is to be included. If there is any uncertainty the study will be excluded.

13  
14 Furthermore, full articles, abstracts, conference posters, or power point presentations  
15 unavailable for review will be excluded.  
16  
17

### 18 **Stage 3: Study selection**

19  
20 Initially the title and abstract will be screened by two members of the research team. The team  
21 may at this stage need to discuss the inclusion and exclusion criteria and refine the search.[19]  
22 If the title is in line with the review purpose the abstract will be read. This procedure will be  
23 conducted by two researchers separately, guided by the inclusion criteria and research  
24 questions. If any disagreement appears, a third research member will be consulted. This initial  
25 step will determine whether the criteria capture relevant studies. Further, the full-text articles  
26 will be imported into the web-based bibliographic manager RefWorks 2.0 to enable removal  
27 of duplicates and for organizational feasibility. Each paper will be given a unique number for  
28 identification and to keep track of included and excluded articles.[24]  
29  
30  
31  
32  
33  
34  
35  
36

### 37 **Stage 4: Charting the data**

38  
39 The full-text articles will be screened by three researchers independently. A charting form  
40 will be used for managing the documentation of extracted data from the included studies. The  
41 charting form will include the inclusion criteria and an explanation of why the study is  
42 included or excluded at this stage in the process. If there are any reservations or discordant  
43 opinions a fourth researcher will be consulted until consensus is reached. Studies meeting the  
44 inclusion criterias will be critical evaluated using CASP.[23] The methodological quality will  
45 be graded with moderate when meeting 6-8 criteria and high 9-10 criteria of the CASP  
46 checklist.[25]To enable replications by others, increase reliability of the findings and for  
47 methodological accuracy[15] the process will be documented using the Preferred Reporting  
48 Items for Systematic Reviews and Meta-Analyses (PRISMA) presented by Moher et al.[26]  
49 The PRISMA flow diagram visualise selection process of included and excluded articles  
50  
51  
52  
53  
54  
55  
56  
57

1  
2  
3 during each stage of the search process. The PRISMA checklist will support rigor report of  
4 the review using the 24 item checklist.[26]  
5

### 6 **Stage 5: Collating, summarising and reporting results**

7 Collating and managing the results from the included articles will be conducted by using a  
8 data analysis software program, NVivo 11. NVivo is a code-based system developed to  
9 support structured qualitative data.[27] Even though, the analysis part of the data material  
10 needs to be abstracted by the researcher, the software may support an overview of codes,  
11 themes and their relationships and connections.[27]  
12  
13  
14  
15

16 We will perform a narrative synthesis using an inductive methodology. Analysing the  
17 qualitative data will be conducted by using the principles for thematic analysis as presented  
18 by Braun and Clarke.[28] Thematic analysis is a method for identifying, analysing and  
19 reporting patterns within data [28] and has a both qualitative and quantitative methodology.  
20 [29] It allows a large amount of data and can highlight differences and similarities across a  
21 data set. The themes will be identified at a semantic level from the written text.[28] To  
22 maintain quality and trustworthiness each stage of the data analysis will be presented in a  
23 scheme.[28] The findings will be presented under thematic headings using a summary table  
24 which can inform a description of key points. Further, detailed tables will present: a) author  
25 (s) b) the geographical distribution of studies c) year of publication d) educational  
26 interventions presented e) the professional healthcare program that the studies refers to f)  
27 reported experiences, outcome and main findings of peer assessment initiatives and g)  
28 research methodology.  
29  
30  
31  
32  
33  
34  
35  
36  
37  
38

### 39 **Stage 6: Consultation**

40  
41 Consultation is an optional stage,[15] however, since it adds methodological rigor[19] it  
42 will be incorporated in the scoping review. The consultation will be conducted when  
43 preliminary results are organised in charts and tables (stage 5). Stakeholders from  
44 healthcare education programs (students and teachers) and healthcare institutions  
45 (preceptors) will be provided with an overview of the preliminary results. The purpose of  
46 the consultation is to enhance the validity of the study outcome.  
47  
48  
49  
50

## 51 **ETHICS AND DISSEMINATION**

52  
53  
54 Research ethics approval is not required for a scoping review. Information will only be  
55 extracted from public databases. The result of this scoping protocol will form the basis for  
56  
57

conducting a scoping review of formative peer assessment in a healthcare education program. The results will be presented at national and international conferences and published in peer-reviewed journals.

**Authors' Contribution:** MS led the design, search strategy and conceptualization of this work and drafted the protocol. EM, MB and EC were involved in the conceptualization of the review design, inclusion and exclusion criteria and provided feedback on the methodology and the manuscript. All authors give their approval to the publishing of this protocol manuscript.

**Funding statement:** This research received no specific grant from any funding agency in the public, commercial or not-for-profit sectors.

**Patient and/or public involvement:** None

**Competing interests:** None declared

## REFERENCES

- 1 Boud D, Cohen R, Sampson J. Peer learning and assessment. *Assessment and Evaluation in Higher Education* 1999; 24(4)413-26.
- 2 Topping KJ, Ehly SW. Peer assisted learning: a framework for consultation. *Journal of Educational and Psychological Consultation* 1998;12:113-32.
- 3 Dannefer EF, Henson LC, Bierer B et al. Peer assessment of professional competence. *Medical Education* 2005;39:713-22.
- 4 Casey CH, Mee L, Smith R et al. Use of peer assessment as a student engagement strategy in nurse education. *Nursing and Health Sciences* 2011;13:514-20.
- 5 Orsmond P, Merry S, Callaghan A. Implementation of a formative assessment model incorporating peer and self-assessment. *Innovations in Education and Teaching International* 2004;41(3)273-90.
- 6 Cassidy S. Developing employability skills: peer assessment in higher education. *Education + Training* 2006;48(7) 508-17.
- 7 Black P, Wiliam D. Assessment and Classroom Learning. *Assessment in Education: Principles, Policy & Practice* 1998;5(1)7-74.
- 8 Sadler D. Beyond feedback: developing student capability in complex appraisal. *Assessment & Evaluation in Higher Education* 2010;35(5)535-50.
- 9 Topping KJ. Peer Assessment. *Theory into Practice* 2009;48:20–27.



- 1  
2  
3 10 Reece I, Walker S. A Practical Guide to Teaching, Training and Learning. 6th ed.  
4 Sunderland: Business Education Publishers 2007.  
5  
6 11 Olusegun S. Constructivism Learning Theory: A Paradigm for Teaching and  
7 Learning. *Journal of Research & Method in Education* 2015;56: 66-70.  
8  
9 12 Hastie C, Fahy K, Parratt J. The development of a rubric for peer assessment of  
10 individual teamwork skills in undergraduate midwifery students. *Women and Birth*  
11 2014;27:220-26.  
12  
13 13 Nicol DJ, MacFarlane-Dick D. Formative assessment and self-regulated  
14 learning: A model and seven principles of good feedback practice. *Studies in*  
15 *Higher Education* 2006;31(2)199-218.  
16  
17 14 Higher Education Academy. Assessment and feedback in higher education. A review  
18 of literature of Higher Education Academy. Jackel B, Pearce J, Radloff A, Daniels E.  
19 Transforming teaching and inspiring learning 2017.  
20  
21 15 Arksey H, O'Malley L. Scoping studies: Towards a methodological framework. *International*  
22 *Journal of Social Research Methodology* 2005;8(1)19-32.  
23  
24 16 Pham MT, Rajic A, Greg JD et al. A scoping review of scoping reviews:  
25 advancing the approach and enhancing the consistency. *Research Synthesis*  
26 *Methods* 2014;5:371-85.  
27  
28 17 Davis K, Drey N, Gould D. What are scoping studies? A review of the nursing  
29 literature. *International Journal of Nursing Studies* 2009;46:1386-400.  
30  
31 18 Guerra O, Kurtz D. Building collaboration: A scoping review of cultural competency  
32 and safety education and training for healthcare students and professionals in Canada.  
33 *Teaching and learning in Medicine* 2017;29(2)129-42.  
34  
35 19 Levac D, Colquhoun H, O'Brian KK. Scoping studies: advancing the methodology.  
36 *Implementation science* 2010;5:69.  
37  
38 20 DiCenso A, Martin-Misener R, Bryant-Lukosius D et al. Advanced practice nursing in  
39 Canada: overview of a decision support synthesis. *Nursing Leadership* 2010;23:15-34.  
40  
41 21 Mays N, Roberts E, Popay J. Synthesizing research evidence. In: Fulop N, Allen P,  
42 Clark A, Black N, eds. Studying the organization and delivery of services: Research  
43 methods. London: Routledge 2001;188-219.  
44  
45 22 Joanna Briggs Institute. The Joanna Briggs Institute Reviewers' Manual 2015.  
46 Methodology for JBI Scoping reviews. The University of Adelaide. South Australia  
47 2015.  
48  
49 23 Critical Appraisal Skills Programme. CASP checklist. 2018 Available at: [https://casp-](https://casp-uk.net/casp-tools-checklists/)  
50 [uk.net/casp-tools-checklists/](https://casp-uk.net/casp-tools-checklists/) Accessed: 5 August 2018.  
51  
52 24 Daudt HM, van Mossel C, Scott SJ. Enhancing the study methodology: a large,  
53  
54  
55  
56  
57  
58  
59  
60



1  
2  
3 interprofessional team's experience with Arksey and O'Malley's framework. *BMC*  
4 *Medical Research Methodology* 2013;13(48).

5  
6 25 Horntvedt ME, Nordsteien A, Fermann T et al. Strategies for teaching evidence-based  
7 nursing education: a thematic literature review. *BMC Medical Education*. 2018;18:172.

8  
9 26 Moher D, Liberati A, Tetzlaff J et al. The PRISMA Group. Preferred Reporting  
10 *Items for Systematic Reviews and Meta-Analyses: The PRISMA Statement*.  
11 PLoS Med 2009;6(7)e1000097.

12  
13 27 Silver C, Lewins, A. Using software in Qualitative research a step-by-step guide.  
14 London: Sage Publication 2007.

15  
16 28 Braun V, Clarke V. Using thematic analysis in psychology. *Qualitative Research in*  
17 *Psychology* 2006;3:77-101.

18  
19 29 Mays N, Pope C, Popay J. Systematically reviewing qualitative and quantitative  
20 evidence to inform management and policy-making in the health field. *Journal of*  
21 *Health Services Research & Policy* 2005;10:1:6-20.  
22  
23  
24  
25  
26  
27  
28  
29  
30  
31  
32  
33  
34  
35  
36  
37  
38  
39  
40  
41  
42  
43  
44  
45  
46  
47  
48  
49  
50  
51  
52  
53  
54  
55  
56  
57  
58  
59  
60

**PRISMA-P (Preferred Reporting Items for Systematic review and Meta-Analysis Protocols) 2015 checklist: recommended items to address in a systematic review protocol\***

| Section and topic                 | Item No | Checklist item                                                                                                                                                                                                                                                                                                                                                                                                                                                                                                                                                                                                                                                                                                                                                      |
|-----------------------------------|---------|---------------------------------------------------------------------------------------------------------------------------------------------------------------------------------------------------------------------------------------------------------------------------------------------------------------------------------------------------------------------------------------------------------------------------------------------------------------------------------------------------------------------------------------------------------------------------------------------------------------------------------------------------------------------------------------------------------------------------------------------------------------------|
| <b>ADMINISTRATIVE INFORMATION</b> |         |                                                                                                                                                                                                                                                                                                                                                                                                                                                                                                                                                                                                                                                                                                                                                                     |
| Title:                            |         |                                                                                                                                                                                                                                                                                                                                                                                                                                                                                                                                                                                                                                                                                                                                                                     |
| Identification                    | 1a      | Formative peer assessment in healthcare education programs – protocol for a scoping review (p.1)                                                                                                                                                                                                                                                                                                                                                                                                                                                                                                                                                                                                                                                                    |
| Update                            | 1b      | No                                                                                                                                                                                                                                                                                                                                                                                                                                                                                                                                                                                                                                                                                                                                                                  |
| Registration                      | 2       | Not registered.                                                                                                                                                                                                                                                                                                                                                                                                                                                                                                                                                                                                                                                                                                                                                     |
| Authors:                          |         |                                                                                                                                                                                                                                                                                                                                                                                                                                                                                                                                                                                                                                                                                                                                                                     |
| Contact                           | 3a      | <u>Corresponding author</u> : Marie Stenberg, Faculty of Health and Society, Jan Waldenströmsg 25, Malmö University, SE 214 28 Malmö, Sweden Tel: +46 40 665 79 44 E-Mail: <a href="mailto:marie.stenberg@mau.se">marie.stenberg@mau.se</a><br><br>Co-authors: Elisabeth Mangrio, Faculty of Health and Society, Malmö University, Sweden E-mail: <a href="mailto:Elisabeth.mangrio@mau.se">Elisabeth.mangrio@mau.se</a><br><br>Mariette Bengtsson, Faculty of Health and Society, Malmö University, Sweden E-mail: <a href="mailto:mariette.bengtsson@mau.se">mariette.bengtsson@mau.se</a><br><br>Elisabeth Carlson, Faculty of Health and Society, Malmö University, Sweden E-mail: <a href="mailto:Elisabeth.carlson@mau.se">Elisabeth.carlson@mau.se</a> (p.1) |
| Contributions                     | 3b      | MS led the design, search strategy and conceptualization of this work and drafted the protocol. EM, MB and EC were involved in the conceptualization of the review design, inclusion and exclusion criteria and provided feedback on the methodology and the manuscript. All authors give their approval to the publishing of this protocol manuscript. (p.9)                                                                                                                                                                                                                                                                                                                                                                                                       |
| Amendments                        | 4       | If we need to amend this protocol, we will give the date of each amendment, describe the change and give the rationale in this section. Changes will not be incorporated into the protocol                                                                                                                                                                                                                                                                                                                                                                                                                                                                                                                                                                          |
| Support:                          |         |                                                                                                                                                                                                                                                                                                                                                                                                                                                                                                                                                                                                                                                                                                                                                                     |
| Sources                           | 5a      | This research received no specific grant from any funding agency in the public, commercial or not-for-profit sectors. (p.9)                                                                                                                                                                                                                                                                                                                                                                                                                                                                                                                                                                                                                                         |
| Sponsor                           | 5b      | No funding has been received for this study (p.9)                                                                                                                                                                                                                                                                                                                                                                                                                                                                                                                                                                                                                                                                                                                   |
| Role of sponsor or funder         | 5c      | None                                                                                                                                                                                                                                                                                                                                                                                                                                                                                                                                                                                                                                                                                                                                                                |
| <b>INTRODUCTION</b>               |         |                                                                                                                                                                                                                                                                                                                                                                                                                                                                                                                                                                                                                                                                                                                                                                     |

1  
2  
3  
4  
5  
6  
7  
8  
9  
10  
11  
12  
13  
14  
15  
16  
17  
18  
19  
20  
21  
22  
23  
24  
25  
26  
27  
28  
29  
30  
31  
32  
33  
34  
35  
36  
37  
38  
39  
40  
41  
42  
43  
44  
45  
46  
47

---

Rationale 6 Formative peer assessment in healthcare education programs – protocol for a scoping review  
 In formative peer assessment the students give and receive feedback from each other and expand their knowledge in a social context of interaction and collaboration. The ability to collaborate and communicate are essential parts of the healthcare professionals’ competence and delivery of safe patient care. Thereby, it is of utmost importance to support students with activities fostering those competences during their healthcare education. The aim of the scoping review is to compile research on peer assessment presented in healthcare education programs, focusing formative assessment. The scoping review will act as a guide prior to developing a peer assessment intervention in a healthcare program. (p.4)

---

Objectives 7 The aim of this scoping review is to compile research about peer assessment presented in higher education, focusing formative assessment. The primary research question is:

- How are formative peer assessment interventions delivered in healthcare education?

Further questions to be answered are:

- What are the rationales for using formative peer assessment in healthcare education?
- What experiences of formative peer assessment are presented from the perspective of students and teachers in healthcare education and in what context (e.g. clinical practice, pre-clinical- and theoretical courses)?
- What outcomes are presented from formative peer assessment interventions?

| Population                  | Concept                                                                               | Context                                           |
|-----------------------------|---------------------------------------------------------------------------------------|---------------------------------------------------|
| Students assessing students | Intervention, rationale, outcome, context and experience of formative peer assessment | Healthcare education programs in higher education |

(p. 5 and 6)

**METHODS**

---

Eligibility criteria 8 The following inclusion criteria will be applied in the search: a) the articles have to address peer assessment in higher education b) focusing formative peer assessment c) students in healthcare education programs d) peer reviewed articles, grey literature, books etc.  
 Since the distinction between different assessment terms and how different authors define peer assessment varies, related concepts to peer assessment (peer feedback, peer evaluation, peer observation, peer reflection etc.) will be incorporated in the search to ensure that no study is missed due to ambiguity in definition of the subject.  
 Articles including summative peer assessment will be excluded unless the study involves formative assessment. However, a distinction between the two must be transparent if the study is to be included. If there is any uncertainty the study will be excluded. Furthermore, full articles, abstracts, conference posters, or power point presentations unavailable for review will be excluded. No limitations will be set to the year of publication. Limitation in language is set to English and Swedish. (p.6 and 7)

---

Information sources 9 The literature search will be conducted in the peer-reviewed databases, PubMed, Cumulative Index to Nursing and Allied

---

|                         |                                                                                                                                                                                                                                                                                                                                                                                                                                                                                                                                                                                                                                                                                                                                                                                                                                                                                                                                                                                                                                                                                                                                                |
|-------------------------|------------------------------------------------------------------------------------------------------------------------------------------------------------------------------------------------------------------------------------------------------------------------------------------------------------------------------------------------------------------------------------------------------------------------------------------------------------------------------------------------------------------------------------------------------------------------------------------------------------------------------------------------------------------------------------------------------------------------------------------------------------------------------------------------------------------------------------------------------------------------------------------------------------------------------------------------------------------------------------------------------------------------------------------------------------------------------------------------------------------------------------------------|
|                         | Health Literature (CINAHL), Education Research Complete (ERC) and Education Research Centre (ERIC). Search tools such as Medical Subject Headings (MeSH), Headings, Thesaurus and Boolean operators (AND/OR) will be used to expand and narrow the search. Additional search will be performed in Google Scholar, hand-search reference lists of included studies and Libsearch for identification of grey literature. The search will be conducted between September and December 2018. No limitations will be set to the year of publication. Finally, search strategies will be developed in collaboration with a research librarian well versed in research databases. (p.6)                                                                                                                                                                                                                                                                                                                                                                                                                                                               |
| Search strategy         | 10 Draft of search strategy in Pub Med<br><br>#1 (MESH) Feedback OR Judgement* OR Collaboration OR Intersectional collaboration OR Formative Feedback* OR Cooperative Behaviour OR Educational Measurement OR (Free text) “peer assessment” OR Peer feedback OR Peer assessment OR Peer-assessment OR Peer review OR Peer chart review OR Peer assess* OR Peer-to-peer OR Peer observation OR Peer* OR Peer rating* OR Near-peer Peer ranking* OR Peer evaluation* OR Peer examiner* OR peer-to-peer discourse OR Peer grade* OR Peer marking<br>#2 (MESH) Education, Graduate OR Education, Professional OR Higher Education Undergraduate study OR (Free text) “higher education” OR Academic education<br>#3 (MESH) Formative feedback OR Constructive feedback OR (Free text) formative OR Formative assessment OR Formative assess*<br>#4 (MESH) Students OR Students, Premedical OR Students, Nursing OR Students, Medical OR Students, Dental OR Students, Healthcare Occupations OR (Free text) students OR University students<br>#1 AND #2 AND #3 AND #4<br><br>Search will be conducted between September and December 2018. (p. 6) |
| Study records:          |                                                                                                                                                                                                                                                                                                                                                                                                                                                                                                                                                                                                                                                                                                                                                                                                                                                                                                                                                                                                                                                                                                                                                |
| Data management         | 11a The full-text articles will be imported into the web-based bibliographic manager RefWorks 2.0 to enable removal of duplicates and for organizational feasibility. Each paper will be given a unique number for identification and to keep track of included and excluded articles. (p. 7)                                                                                                                                                                                                                                                                                                                                                                                                                                                                                                                                                                                                                                                                                                                                                                                                                                                  |
| Selection process       | 11b The title and abstract will be screened by two members of the research team. The team may at this stage need to discuss the inclusion and exclusion criteria and refine the search. If the titles are in line with the review purpose the abstract will be read. This procedure will be conducted by two researchers separately and guided by the inclusion criteria and research questions. If any disagreement appears, a third research member will be consulted. The full-text articles will be screened by three researchers independently. For managing the documentation of extracted data from the included studies a charting form will be used. The charting form will include the inclusion criteria and an explanation of why the study is included or excluded at this stage in the process. If there are any reservations or discordant opinions a fourth researcher will be consulted until consensus is reached. (p.7)                                                                                                                                                                                                     |
| Data collection process | 11c For managing the documentation of extracted data from the included studies a charting form will be used. The charting form will include the inclusion criteria and an explanation of why the study is included or excluded at this stage in the process. If there are any reservations or discordant opinions a fourth researcher will be consulted until consensus is reached. (p. 7)                                                                                                                                                                                                                                                                                                                                                                                                                                                                                                                                                                                                                                                                                                                                                     |
| Data items              | 12 Detailed tables will present: a) author (s) b) the geographical distribution of studies c) year of publication d) educational                                                                                                                                                                                                                                                                                                                                                                                                                                                                                                                                                                                                                                                                                                                                                                                                                                                                                                                                                                                                               |

interventions presented e) the professional healthcare program that the studies refers to f) reported experiences, outcome and main findings of peer assessment initiatives and g) research methodology. (p.8)

1  
2  
3  
4  
5  
6  
7  
8  
9  
10  
11  
12  
13  
14  
15  
16  
17  
18  
19  
20  
21  
22  
23  
24  
25  
26  
27  
28  
29  
30  
31  
32  
33  
34  
35  
36  
37  
38  
39  
40  
41  
42  
43  
44  
45  
46  
47

|                                    |     |                                                                                                                                                                                                                                                                                                                                                                                                                                                                                                                                                                                                                                                                                                                                                                                                                                                                                                                                                                                                                                                                                                                                                                                                                       |
|------------------------------------|-----|-----------------------------------------------------------------------------------------------------------------------------------------------------------------------------------------------------------------------------------------------------------------------------------------------------------------------------------------------------------------------------------------------------------------------------------------------------------------------------------------------------------------------------------------------------------------------------------------------------------------------------------------------------------------------------------------------------------------------------------------------------------------------------------------------------------------------------------------------------------------------------------------------------------------------------------------------------------------------------------------------------------------------------------------------------------------------------------------------------------------------------------------------------------------------------------------------------------------------|
| Outcomes and prioritization        | 13  | The result of the scoping review will form the basis for developing and conducting an intervention focusing collaborative learning and peer assessment in a healthcare education program. Therefore, the main prioritization <del>is</del> <b>are</b> outcomes presented in intervention studies to enable to answer the research question: ‘How are formative peer assessment interventions delivered in healthcare education?’ and ‘What outcomes are presented from formative peer assessment interventions?’ Furthermore, studies presenting results of experiences and rationales of using peer assessment to answer the questions: <ul style="list-style-type: none"> <li>• What are the rationales for using formative peer assessment in healthcare education?</li> <li>• What experiences of formative peer assessment are presented from the perspective of students and teachers in healthcare education and in what context (e.g. clinical practice, pre-clinical- and theoretical courses)?</li> </ul> This may provide the research team with a broad knowledge of peer assessment in healthcare education programs before planning and proceeding with further interventions in this area. (p.5 and 6) |
| Risk of bias in individual studies | 14  | Studies meeting the inclusion criteria will be critical evaluated using Critical Appraisal Skills Programme (CASP). The methodological quality will be graded moderate when meeting 6-8 criteria and high 9-10 of the CASP checklist. (p. 7)                                                                                                                                                                                                                                                                                                                                                                                                                                                                                                                                                                                                                                                                                                                                                                                                                                                                                                                                                                          |
| Data synthesis                     | 15a | Both qualitative and quantitative data will be synthesised using the thematic methodology as presented by Braun and Clarke. (p 8)                                                                                                                                                                                                                                                                                                                                                                                                                                                                                                                                                                                                                                                                                                                                                                                                                                                                                                                                                                                                                                                                                     |
|                                    | 15b | This scoping review will not conduct any meta-analysis.                                                                                                                                                                                                                                                                                                                                                                                                                                                                                                                                                                                                                                                                                                                                                                                                                                                                                                                                                                                                                                                                                                                                                               |
|                                    | 15c | None additional analyses will be conducted.                                                                                                                                                                                                                                                                                                                                                                                                                                                                                                                                                                                                                                                                                                                                                                                                                                                                                                                                                                                                                                                                                                                                                                           |
|                                    | 15d | A narrative synthesis will be provided. Information will be presented in text and tables to summarise and explain the characteristics and findings of the included studies. (p.8)                                                                                                                                                                                                                                                                                                                                                                                                                                                                                                                                                                                                                                                                                                                                                                                                                                                                                                                                                                                                                                     |
| Meta-bias(es)                      | 16  | The PRISMA-P and PRISMA guidance will be utilized. Included primary research will be assessed for bias. Studies with statistically non-significant or negative results will not be excluded. (p. 7 and 8)                                                                                                                                                                                                                                                                                                                                                                                                                                                                                                                                                                                                                                                                                                                                                                                                                                                                                                                                                                                                             |
| Confidence in cumulative evidence  | 17  | Not applicable for this scoping review protocol                                                                                                                                                                                                                                                                                                                                                                                                                                                                                                                                                                                                                                                                                                                                                                                                                                                                                                                                                                                                                                                                                                                                                                       |

**\* It is strongly recommended that this checklist be read in conjunction with the PRISMA-P Explanation and Elaboration (cite when available) for important clarification on the items. Amendments to a review protocol should be tracked and dated. The copyright for PRISMA-P (including checklist) is held by the PRISMA-P Group and is distributed under a Creative Commons Attribution Licence 4.0.**

*From: Shamseer L, Moher D, Clarke M, Ghersi D, Liberati A, Petticrew M, Shekelle P, Stewart L, PRISMA-P Group. Preferred reporting items for systematic review and meta-analysis protocols (PRISMA-P) 2015: elaboration and explanation. BMJ. 2015 Jan 2;349(jan02 1):g7647.*
